# Supplementary material for: Tceal7 Regulates Skeletal Muscle Development through Its Interaction with Cdk1
Source: MDPI journal article supplement (doi:10.3390/ijms24076264), 2023-03-27
Supplement: s1 [file s1]

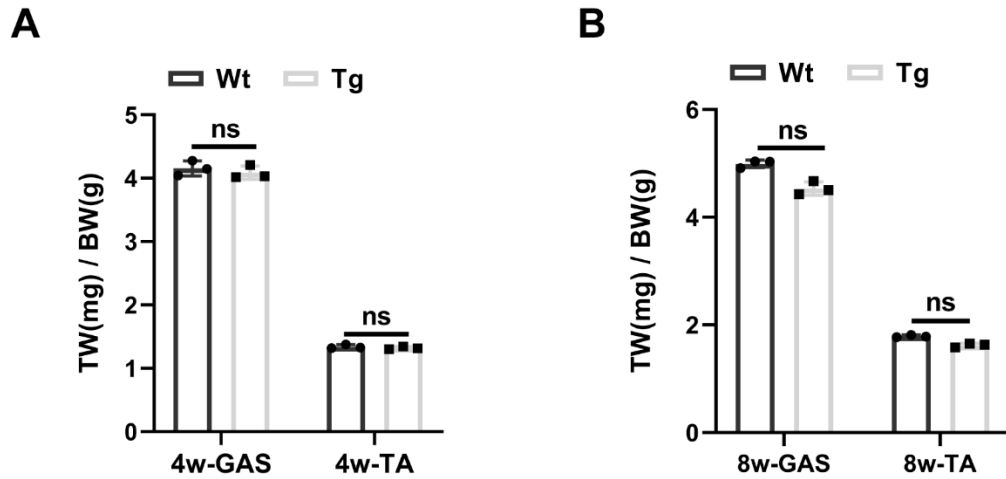

**Figure S1.** Normalized muscle weight of MCK 6.5 kb-HA-Tceal7 transgenic mice and wild-type littermates. The weights of GAS and TA muscles are normalized to total body weight of mice at the age of 4-weeks (A) and 8-weeks (B). All data represent the mean  $\pm$  SD of three independent samples. ns, not significant. TW, tissue weight; BW, body weight.
